# Supplementary material
Source: PubMed Central journal article supplement (PMC3416556)
Supplement: JB.00583-12_zjb999091681so1.pdf [file JB.00583-12_zjb999091681so1.pdf]

## Supplemental Material for Gaidenko *et al.*

Supplemental Tables S1, S2; Supplemental Figures S1, S2; Supplemental figure legends S1, S2.

**Table S1. *Bacillus subtilis* strains**

| Strain | Genotype                                                                       | Construction <sup>1</sup>     |
|--------|--------------------------------------------------------------------------------|-------------------------------|
| PB2    | <i>trpC2</i>                                                                   | 168 Marburg strain            |
| PB198  | <i>amyE::ctc-lacZ trpC2</i>                                                    | (1)                           |
| PB1078 | <i>rsbRBΔ2 rsbRCΔ1::ery rsbRDΔ2 amyE::ctc-lacZ trpC2</i>                       | (3)                           |
| PB1105 | <i>rsbRA K143E rsbRBΔ2 rsbRDΔ2 rsbRCΔ1::ery amyE::ctc-lacZ trpC2</i>           | pTG5973 → PB1078 <sup>2</sup> |
| PB1107 | <i>rsbRA Q142A rsbRBΔ2 rsbRDΔ2 rsbRCΔ1::ery amyE::ctc-lacZ trpC2</i>           | pTG5951 → PB1078 <sup>2</sup> |
| PB1108 | <i>rsbRA E148K rsbRBΔ2 rsbRDΔ2 rsbRCΔ1::ery amyE::ctc-lacZ trpC2</i>           | pTG5974 → PB1078 <sup>2</sup> |
| PB1110 | <i>rsbRA L149R rsbRBΔ2 rsbRDΔ2 rsbRCΔ1::ery amyE::ctc-lacZ trpC2</i>           | pTG5978 → PB1078 <sup>2</sup> |
| PB1138 | <i>rsbRA L146R rsbRBΔ2 rsbRDΔ2 rsbRCΔ1::ery amyE::ctc-lacZ trpC2</i>           | pTG5976 → PB1078 <sup>2</sup> |
| PB1140 | <i>rsbRA V139R rsbRBΔ2 rsbRDΔ2 rsbRCΔ1::ery amyE::ctc-lacZ trpC2</i>           | pTG5977 → PB1078 <sup>2</sup> |
| PB1141 | <i>rsbRA E136K rsbRBΔ2 rsbRDΔ2 rsbRCΔ1::ery amyE::ctc-lacZ trpC2</i>           | (3)                           |
| PB1147 | <i>rsbRA K143A rsbRBΔ2 rsbRDΔ2 rsbRCΔ1::ery amyE::ctc-lacZ trpC2</i>           | pTG6004 → PB1078 <sup>2</sup> |
| PB1148 | <i>rsbRA E148A rsbRBΔ2 rsbRDΔ2 rsbRCΔ1::ery amyE::ctc-lacZ trpC2</i>           | pTG6005 → PB1078 <sup>2</sup> |
| PB1149 | <i>rsbRA L149A rsbRBΔ2 rsbRDΔ2 rsbRCΔ1::ery amyE::ctc-lacZ trpC2</i>           | pTG6006 → PB1078 <sup>2</sup> |
| PB1151 | <i>rsbRA Q142A rsbS S59A rsbRBΔ2 rsbRDΔ2 rsbRCΔ1::ery amyE::ctc-lacZ trpC2</i> | pTG6009 → PB1107 <sup>2</sup> |
| PB1152 | <i>rsbRA E148K rsbS S59A rsbRBΔ2 rsbRDΔ2 rsbRCΔ1::ery amyE::ctc-lacZ trpC2</i> | pTG6009 → PB1108 <sup>2</sup> |
| PB1153 | <i>rsbRA L146A rsbRBΔ2 rsbRDΔ2 rsbRCΔ1::ery amyE::ctc-lacZ trpC2</i>           | pTG6017 → PB1078 <sup>2</sup> |
| PB1154 | <i>rsbRA V139A rsbRBΔ2 rsbRDΔ2 rsbRCΔ1::ery amyE::ctc-lacZ trpC2</i>           | pTG6016 → PB1078 <sup>2</sup> |
| PB1161 | <i>rsbS S59A rsbRBΔ2 rsbRDΔ2 rsbRCΔ1::ery amyE::ctc-lacZ trpC2</i>             | (3)                           |
| PB1166 | <i>rsbRA L149D rsbRBΔ2 rsbRDΔ2 rsbRCΔ1::ery amyE::ctc-lacZ trpC2</i>           | pTG6020 → PB1078 <sup>2</sup> |
| PB1179 | <i>rsbRA K137A rsbRBΔ2 rsbRDΔ2 rsbRCΔ1::ery amyE::ctc-lacZ trpC2</i>           | pTG6021 → PB1078 <sup>2</sup> |
| PB1180 | <i>rsbRA T138A rsbRBΔ2 rsbRDΔ2 rsbRCΔ1::ery amyE::ctc-lacZ trpC2</i>           | pTG6022 → PB1078 <sup>2</sup> |
| PB1182 | <i>rsbRA Q142A amyE::ctc-lacZ trpC2</i>                                        | pTG5951 → PB198 <sup>2</sup>  |
| PB1183 | <i>rsbRA E148K amyE::ctc-lacZ trpC2</i>                                        | pTG5974 → PB198 <sup>2</sup>  |
| PB1188 | <i>rsbRA S140A rsbRBΔ2 rsbRDΔ2 rsbRCΔ1::ery amyE::ctc-lacZ trpC2</i>           | pTG6023 → PB1078 <sup>2</sup> |
| PB1189 | <i>rsbRA L141A rsbRBΔ2 rsbRDΔ2 rsbRCΔ1::ery amyE::ctc-lacZ trpC2</i>           | pTG6024 → PB1078 <sup>2</sup> |
| PB1192 | <i>rsbRA I144A rsbRBΔ2 rsbRDΔ2 rsbRCΔ1::ery amyE::ctc-lacZ trpC2</i>           | pTG6025 → PB1078 <sup>2</sup> |
| PB1193 | <i>rsbRA Q147A rsbRBΔ2 rsbRDΔ2 rsbRCΔ1::ery amyE::ctc-lacZ trpC2</i>           | pTG6026 → PB1078 <sup>2</sup> |

<sup>1</sup>Arrow indicates transformation from donor to recipient

<sup>2</sup>Two-step allele replacement

**Table S2. Plasmids used for strain construction**

| <b>Plasmid</b> | <b>Alteration or relevant feature</b>                                 | <b>Reference</b> |
|----------------|-----------------------------------------------------------------------|------------------|
| pSS4332        | Expresses I-SceI for two-step allele replacement                      | (2)              |
| pTG5916        | pUS19-based integrative plasmid. <i>NdeI</i> site converted to I-SceI | (3)              |
| pTG5923        | <i>rsbRA</i> in pTG5916                                               | (3)              |
| pTG5951        | <i>rsbRA</i> Q142A in pTG5916 (CAA → GCA)                             | This study       |
| pTG5973        | <i>rsbRA</i> K143E in pTG5916 (AAA → GAA)                             | This study       |
| pTG5974        | <i>rsbRA</i> E148K in pTG5916 (GAG → AAG)                             | This study       |
| pTG5976        | <i>rsbRA</i> L146R in pTG5916 (CTG → CGA)                             | This study       |
| pTG5977        | <i>rsbRA</i> V139R in pTG5916 (GTA → CGA)                             | This study       |
| pTG5978        | <i>rsbRA</i> L149R in pTG5916 (CTG → CGA)                             | This study       |
| pTG6004        | <i>rsbRA</i> K143A in pTG5916 (AAA → GCA)                             | This study       |
| pTG6005        | <i>rsbRA</i> E148A in pTG5916 (GAG → GCG)                             | This study       |
| pTG6006        | <i>rsbRA</i> L149A in pTG5916 (CTG → GCG)                             | This study       |
| pTG6009        | <i>rsbS</i> S59A in pTG5916 (TCA → GCA)                               | (3)              |
| pTG6016        | <i>rsbRA</i> V139A in pTG5916 (GTA → GCA)                             | This study       |
| pTG6017        | <i>rsbRA</i> L146A in pTG5916 (CTG → GCG)                             | This study       |
| pTG6020        | <i>rsbRA</i> L149D in pTG5916 (CTG → GAC)                             | This study       |
| pTG6021        | <i>rsbRA</i> K137A in pTG5916 (AAA → GCA)                             | This study       |
| pTG6022        | <i>rsbRA</i> T138A in pTG5916 (ACA → GCA)                             | This study       |
| pTG6023        | <i>rsbRA</i> S140A in pTG5916 (TCC → GCC)                             | This study       |
| pTG6024        | <i>rsbRA</i> L141A in pTG5916 (CTG → GCG)                             | This study       |
| pTG6025        | <i>rsbRA</i> I144A in pTG5916 (ATC → GCC)                             | This study       |
| pTG6026        | <i>rsbRA</i> Q147A in pTG5916 (CAA → GCA)                             | This study       |

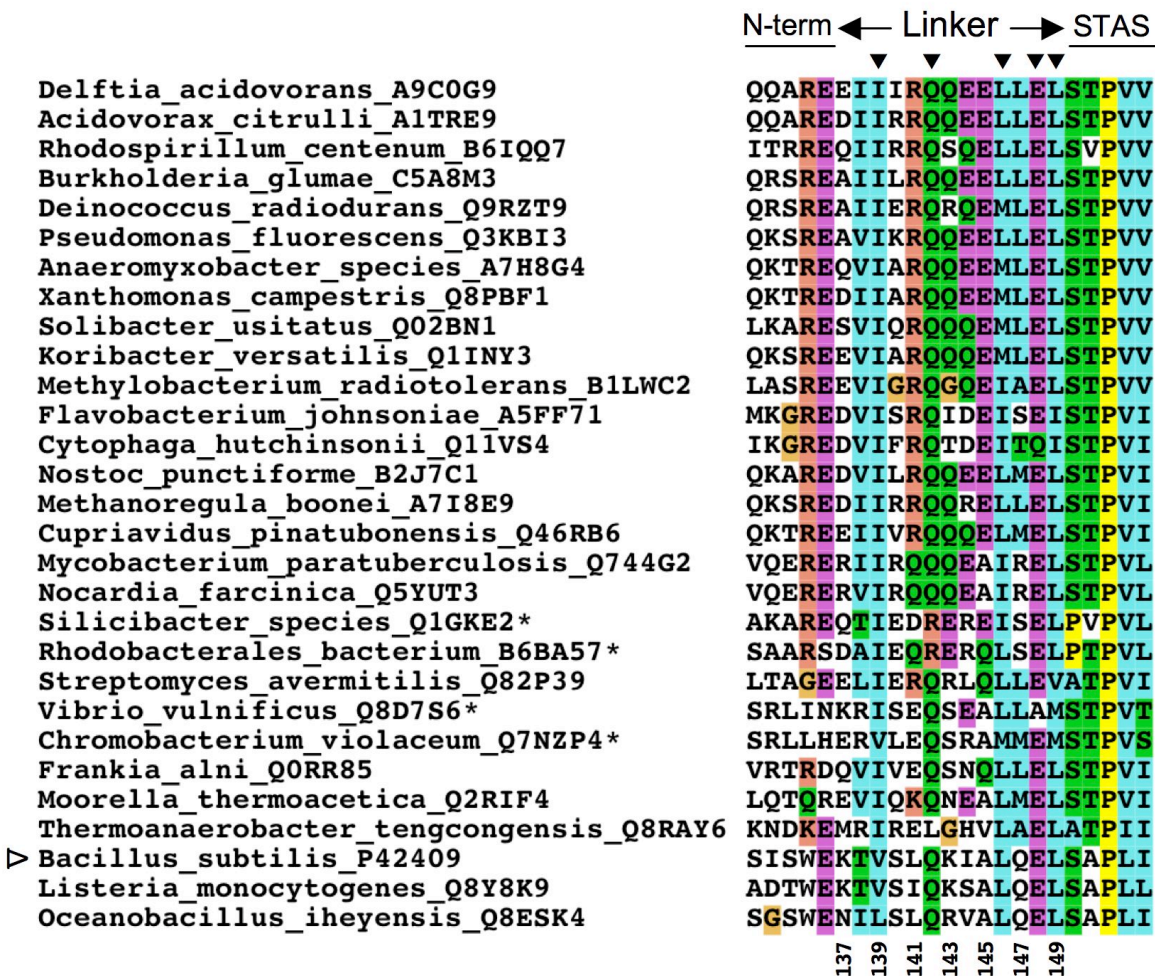

**Fig. S1.** Clustal W alignment of 29 linker regions from RST modules encoded by diverse microbial genomes. Sequence of each RsbRA homologue is labeled by genus\_species and UniProt identifier; these represent one archaeal and seven bacterial phyla. According to the Conserved Domain Database (4), all listed homologues have N-terminal non-heme globin domains except the four protobacterial examples marked by the asterisk following their UniProt identifier; these four possess heme-binding globin domains. Labels above the alignment indicate five residues from the N-terminal globin domain, the 13-residue linker, and five residues from the C-terminal STAS (sulfate transporter and anti-sigma factor antagonist) domain; filled inverted triangles show five highly conserved linker positions. Numbers beneath the alignment designate residue number within *B. subtilis* RsbRA, whose sequence is marked by the open triangle on the left. Color scheme is standard Clustal W: blue for WLWIMFAC; green for TSNQ; magenta for DE; red for KR, orange for G; and yellow for P.

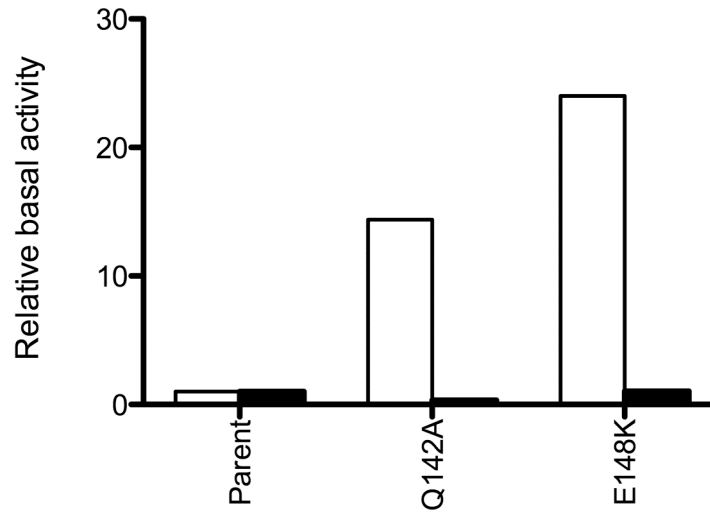

**Fig. S2.** Presence of all four RsbR co-antagonist paralogs masks the enhancing phenotype caused by linker substitutions in RsbRA. White bars show relative basal level in strains encoding only RsbRA, with data taken from Figure 3; black bars show relative basal activity in strains encoding a full co-antagonist complement: RsbRA, RB, RC and RD. Parent indicates wild type RsbRA, whereas Q142A and E148K indicate RsbRA substitution.

### References

1. **Boylan, S. A., A. Rutherford, S. M. Thomas, and C. W. Price.** 1992. Activation of *Bacillus subtilis* transcription factor  $\sigma^B$  by a regulatory pathway responsive to stationary-phase signals. *J Bacteriol* **174**:3695-706.
2. **Cybulski, R. J., Jr., P. Sanz, F. Alem, S. Stibitz, R. L. Bull, and A. D. O'Brien.** 2009. Four superoxide dismutases contribute to *Bacillus anthracis* virulence and provide spores with redundant protection from oxidative stress. *Infect Immun* **77**:274-85.
3. **Gaidenko, T. A., X. Bie, E. P. Baldwin, and C. W. Price.** 2011. Substitutions in the presumed sensing domain of the *Bacillus subtilis* stressosome affect its basal output but not response to environmental signals. *J Bacteriol* **193**:3588-97.
4. **Marchler-Bauer, A., et al.** 2009. CDD: specific functional annotation with the Conserved Domain Database. *Nucleic Acids Res* **37**:D205-10.
